# Supplementary material for: Transcriptional patterns ofCoffea arabicaL. nitrate reductase, glutamine and asparagine synthetase genes are modulated under nitrogen suppression and coffee leaf rust
Source: PeerJ journal article supplement (doi:10.7717/peerj.8320), 2020-01-03
Supplement: FigS4.pdf [file FigS4.pdf]

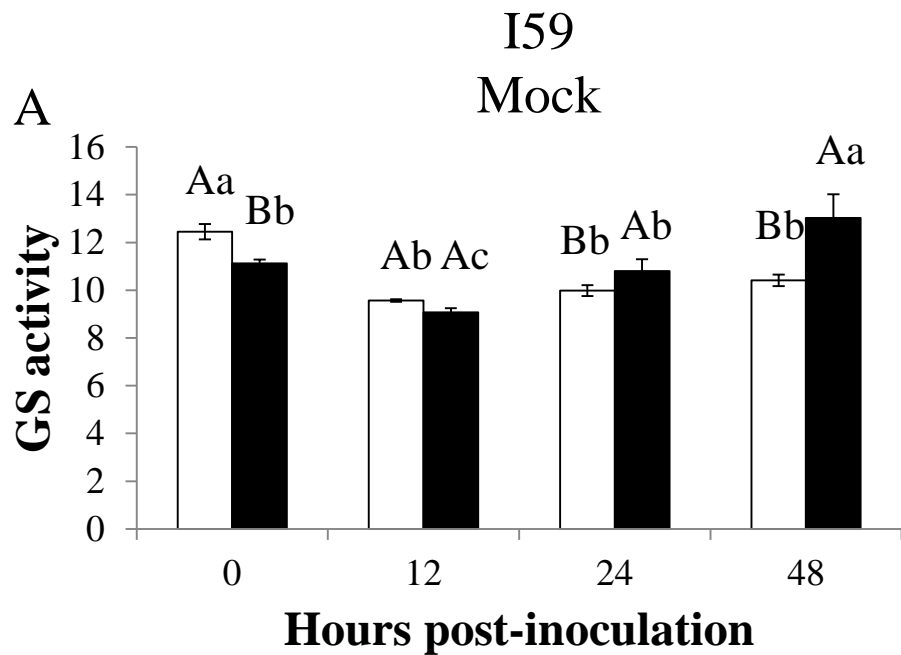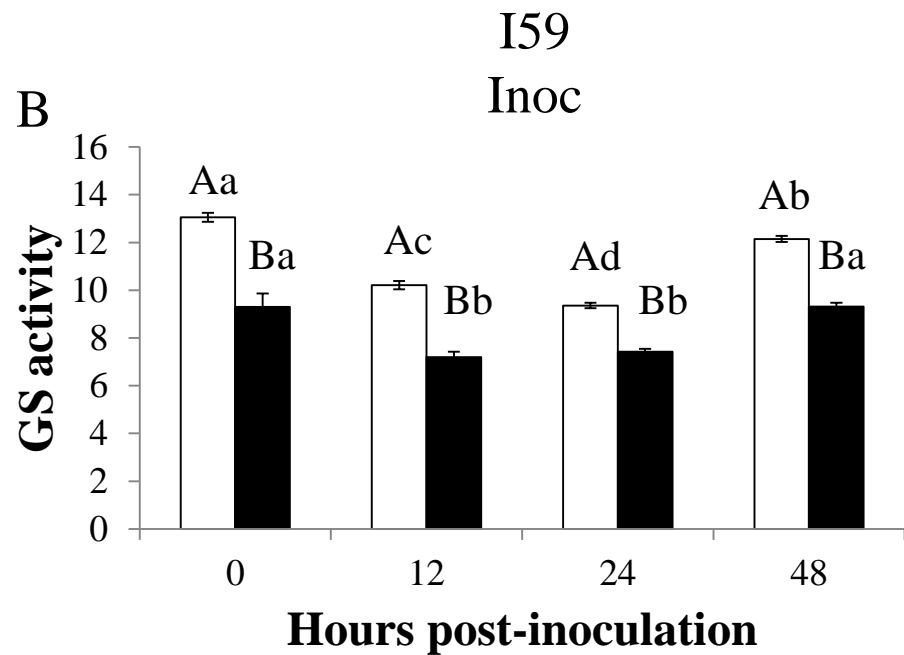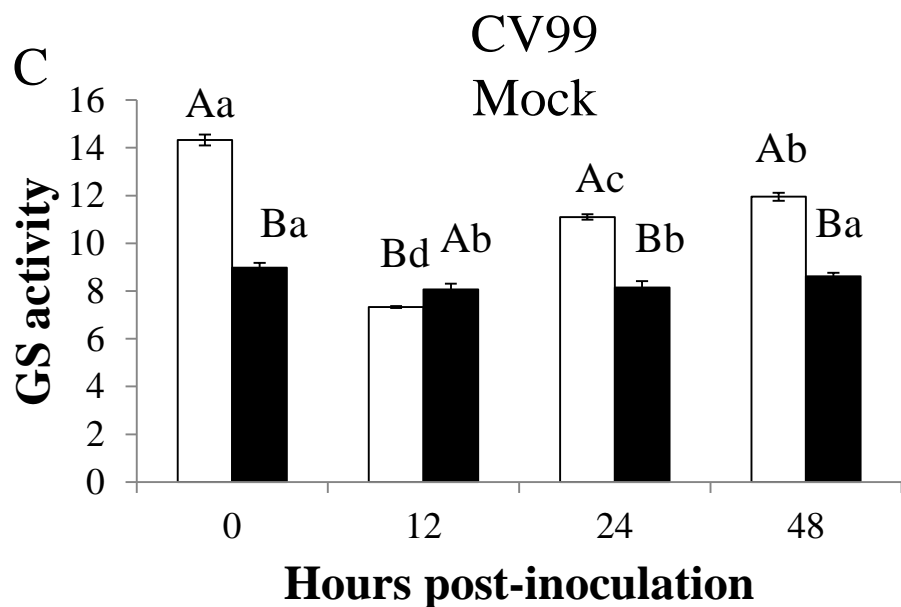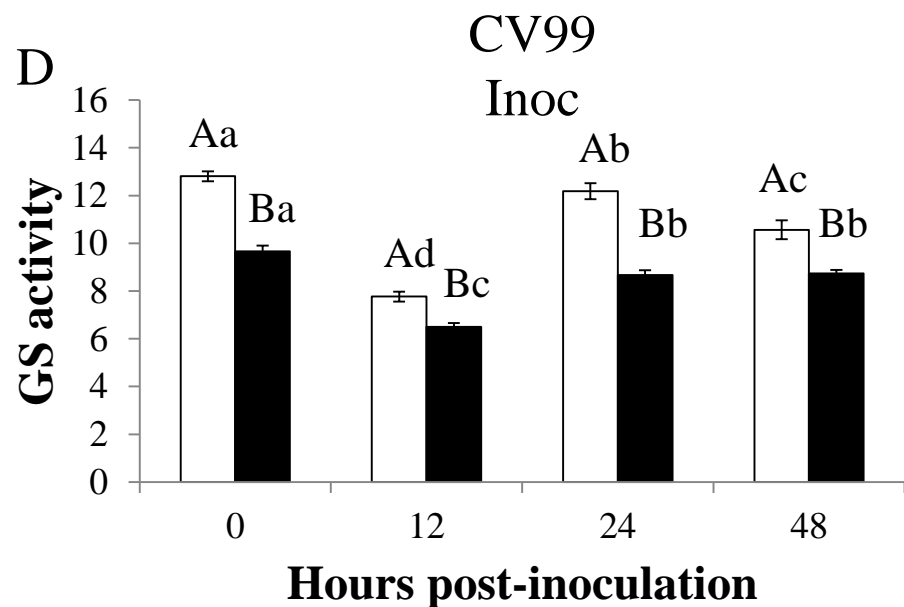

□ N sufficiency    ■ N suppression
